# Supplementary material for: Mechanisms of 5-HT receptor antagonists in the regulation of fibrosis in a 3D human liver spheroid model
Source: PubMed Central journal article supplement (PMC10792007; doi:10.1038/s41598-023-49240-9), 2024-01-16
Supplement: 41598_2023_49240_MOESM1_ESM.pdf [file 41598_2023_49240_MOESM1_ESM.pdf]

### Supplementary Figure S1: Effect of FFA treatment on viability and functionality

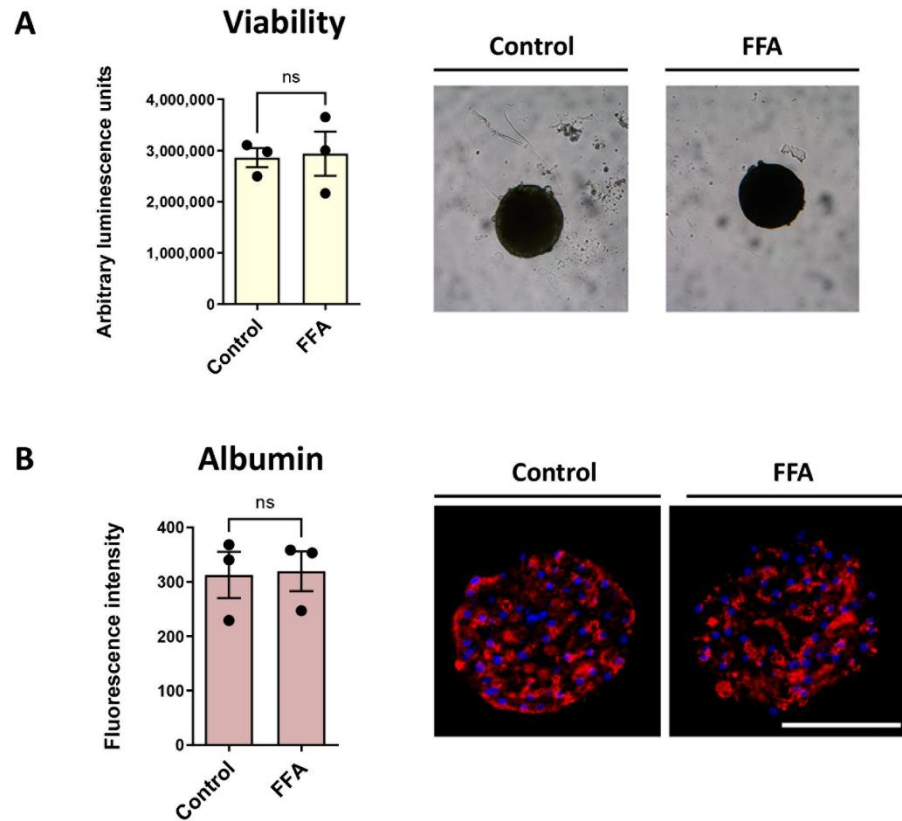

**(A)** Treatment of spheroids with FFA for 7 days did not affect viability of spheroids, which was measured by quantification of the released ATP. One dot represents the average of the ATP measurements in at least 4 spheroids per condition per experiment. (n=3)

**(B)** Treatment of spheroids with FFA did not affect the functionality of hepatocytes in the spheroids, which was measured by the albumin staining. One dot represents the average of at least 10 imaged spheroids per condition per spheroid. (n=3)

**Supplementary Figure S2:** Variation between co-culture spheroids in response to FFA treatment within one experiment - COL1A1

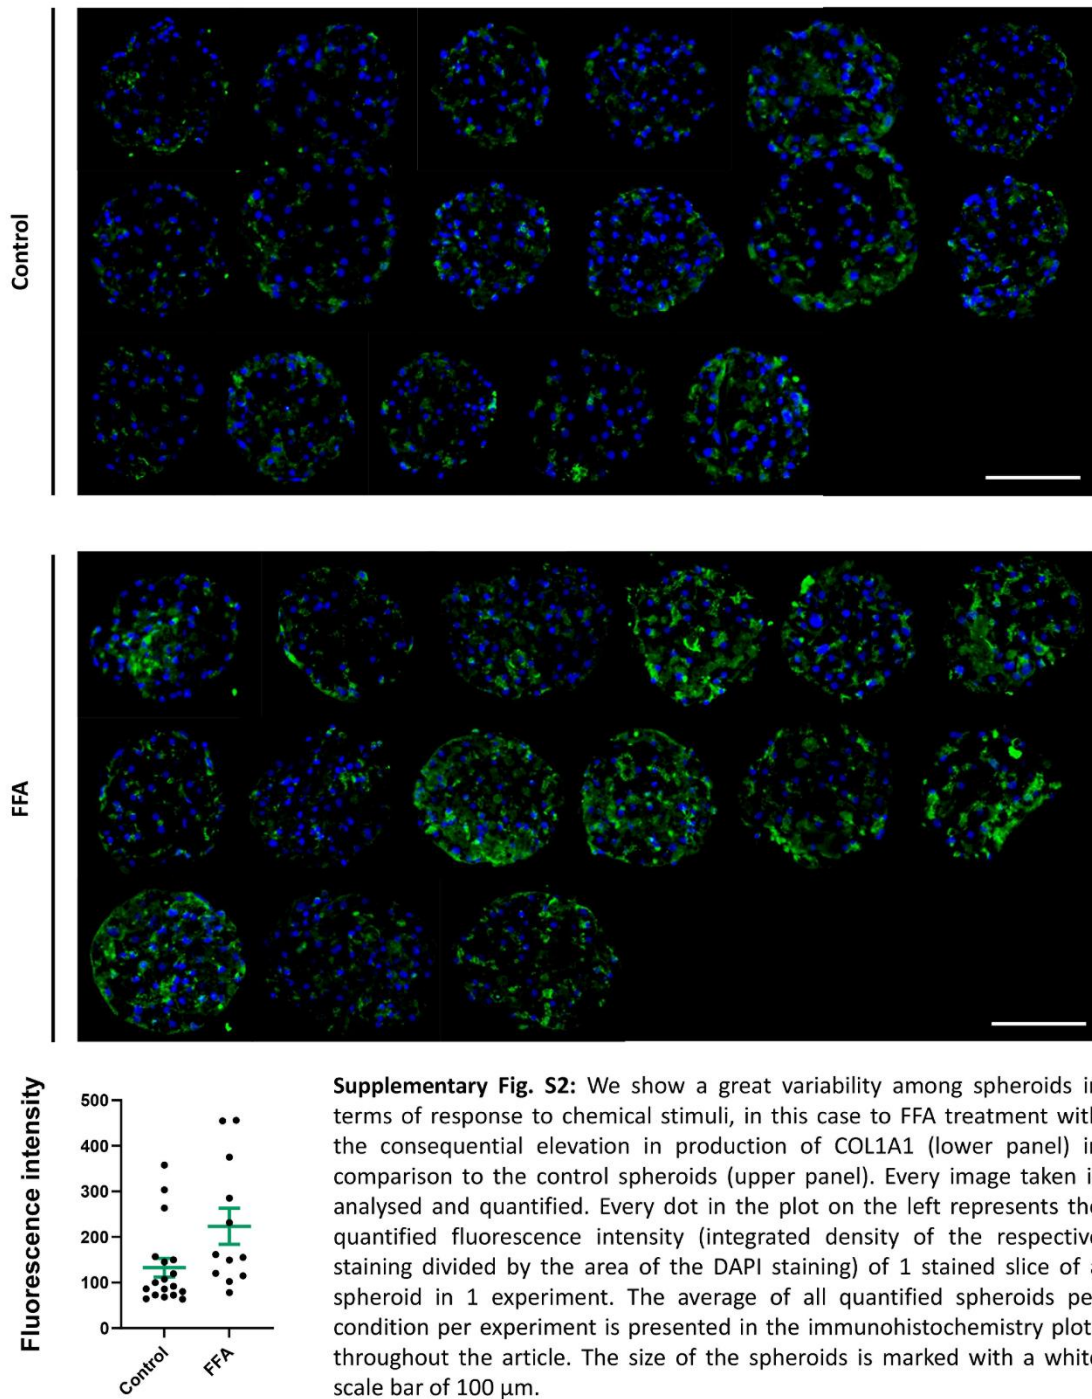

**Supplementary Figure S3: Effect of 5-HT treatment on viability and functionality**

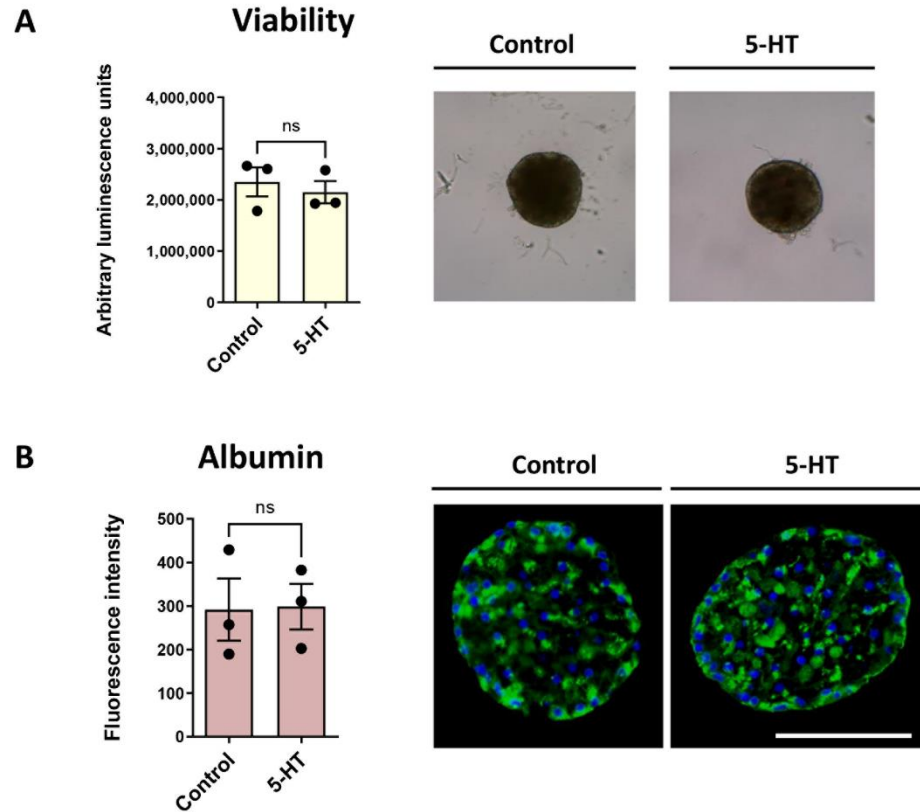

**(A)** Treatment of spheroids with 5-HT for 7 days did not affect viability of spheroids, which was measured by quantification of the released ATP. One dot represents the average of the ATP measurements in at least 4 spheroids per condition per experiment. (n=3)

**(B)** Treatment of spheroids with 5-HT did not affect the functionality of hepatocytes in the spheroids, which was measured by the albumin staining. One dot represents the average of at least 10 imaged spheroids per condition per spheroid. (n=3)

**Supplementary Table 1:** TaqMan probes used for RT-PCR

| Gene          | TaqMan probe number | Company       |
|---------------|---------------------|---------------|
| <i>COL1A1</i> | Hs00164004_m1       | Thermo Fisher |
| <i>TGFβ1</i>  | Hs00998133_m1       | Thermo Fisher |
| <i>VIM</i>    | Hs00185584_m1       | Thermo Fisher |
| <i>HTR2A</i>  | Hs06626790_s1       | Thermo Fisher |
| <i>LOX</i>    | Hs00942483_m1       | Thermo Fisher |
| <i>IL6</i>    | Hs00174131_m1       | Thermo Fisher |
| <i>TBP</i>    | Hs00427620_m1       | Thermo Fisher |

**Supplementary Table 2:** A list of antibodies used for immunohistochemistry

| Primary Antibody   | Species | Company           | Cat. No.   | Dilution |
|--------------------|---------|-------------------|------------|----------|
| COL1A1             | Rabbit  | Abcam             | ab34710    | 1:200    |
| TGF-β1             | Rabbit  | Abcam             | ab92486    | 1:200    |
| α-SMA              | Mouse   | Abcam             | ab7817     | 1:200    |
| CTGF               | Rabbit  | Abcam             | ab6992     | 1:300    |
| Vimentin           | Rabbit  | Abcam             | ab92547    | 1:200    |
| Albumin            | Mouse   | Santa Cruz        | sc-51515   | 1:200    |
| 5-HT <sub>2A</sub> | Goat    | Novus Biologicals | NBP2-26091 | 1:100    |

  

| Secondary Antibody                 | Company       | Cat. No. | Dilution |
|------------------------------------|---------------|----------|----------|
| Alexa Fluor 488 Goat-anti-Rabbit   | Thermo Fisher | A-11008  | 1:500    |
| Alexa Fluor 555 Donkey-anti-Mouse  | Thermo Fisher | A-31570  | 1:500    |
| Alexa Fluor 488 Donkey-anti-Rabbit | Thermo Fisher | A-21206  | 1:500    |
| Alexa Fluor 555 Donkey-anti-Goat   | Thermo Fisher | A-21432  | 1:500    |

**Supplementary Table 3:** Serotonin quantification

|                      |                    |                | 5-HT concentration (nM) |
|----------------------|--------------------|----------------|-------------------------|
| <b>Mono-cultures</b> | <b>Supernatant</b> | <b>Control</b> | 0,4                     |
|                      |                    | <b>FFA</b>     | 1,3                     |
|                      | <b>Lysate</b>      | <b>Control</b> | 0                       |
|                      |                    | <b>FFA</b>     | 0                       |
| <b>Co-cultures</b>   | <b>Supernatant</b> | <b>Control</b> | 0                       |
|                      |                    | <b>FFA</b>     | 1,2                     |
|                      | <b>Lysate</b>      | <b>Control</b> | 1,2                     |
|                      |                    | <b>FFA</b>     | 0                       |

Mono-cultures present spheroids comprised only of primary human hepatocytes, while co-cultures present spheroids comprised of both primary human hepatocytes and non-parenchymal cells in a designated ratio. Supernatants and lysates of spheroids were used as samples. Spheroids were either controls or treated with free fatty acids (FFA). Concentrations present an average of duplicate analyses.
